# Supplementary material for: Circulating Cytokines in Metastatic Breast Cancer Patients Select Different Prognostic Groups and Patients Who Might Benefit from Treatment beyond Progression
Source: MDPI journal article supplement (doi:10.3390/vaccines10010078), 2022-01-05
Supplement: s1 [file s1]

## Supplementary Materials

|                   |                    | frequency (N) | -1 |
|-------------------|--------------------|---------------|----|
| C2_T0_comparison  | Other pts          | 29            | 0  |
|                   | C2_T0              | 12            | 1  |
| group_lines_eri   | 0=II line          | 10            | 0  |
|                   | 1=> II line        | 31            | 1  |
| metastasis_site   | 1=bone/soft tissue | 6             | 1  |
|                   | 2=visceral         | 35            | 0  |
| metastasis_number | 0=< 2              | 17            | 1  |
|                   | 1=> 2              | 24            | 0  |

f. Variable (0,1). 0 is benchmark where HR was calculated.

| Variables         |        |       |       |    |       |        | Exp(B) 95,0% C.I. |       |
|-------------------|--------|-------|-------|----|-------|--------|-------------------|-------|
|                   | B      | SE    | Wald  | gl | Sign. | Exp(B) | Lower             | Upper |
| C2_T0_comparison  | -1,136 | 0,439 | 6,707 | 1  | 0,010 | 0,321  | 0,136             | 0,759 |
| group_lines_eri   | -0,077 | 0,430 | 0,032 | 1  | 0,857 | 0,926  | 0,398             | 2,152 |
| metastasis_number | -0,230 | 0,429 | 0,288 | 1  | 0,591 | 0,794  | 0,343             | 1,840 |
| metastasis_site   | -0,320 | 0,644 | 0,247 | 1  | 0,619 | 0,726  | 0,205             | 2,566 |

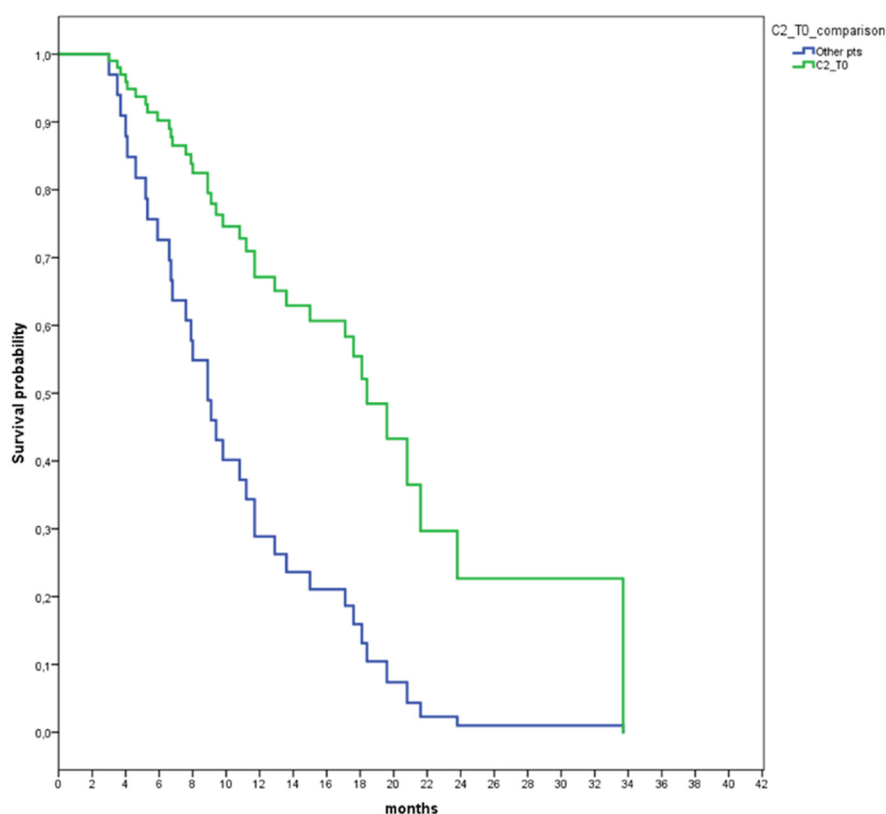

**Figure S1.** Multivariate Cox-analysis, Exp(B)=HR; Sign=p-value.
